# Supplementary material for: Hydrothermal Synthesis, Structural Characterization, Magnetic, Dielectric and Transport Properties of La<sub>2</sub>FeCrO<sub>6</sub> Double Perovskites
Source: Preprints.org preprint supplement (doi:10.20944/preprints202311.1461.v1), 2023-11-23
Supplement: Supplementary file 1 [file supplementary]

## Supporting Information for Nanomaterials

### Hydrothermal synthesis, structural characterization, magnetic, dielectric and transport properties of $\text{La}_2\text{FeCrO}_6$ double perovskites

Kang Yi<sup>1</sup>, Zhiwei Wu<sup>1</sup>, Qingkai Tang<sup>1</sup>, Jiayuan Gu<sup>1</sup>, Jie Ding<sup>1</sup>, Liangdong Chen<sup>1</sup>, Xinhua Zhu<sup>1,\*</sup>

<sup>1</sup>National Laboratory of Solid State Microstructures, School of Physics, Nanjing University, Nanjing 210093, China

\* Correspondence: xhzhu@nju.edu.cn; Tel.: +86-25-83592772

#### Part A-Theoretical $M_S$ value of the LFCO powders and their ASD content determination

To assess the theoretical  $M_S$  value of the LFCO powders based on an intuitive ionic model, one should take into account of the different oxide states of Fe and Cr ions and their relative amount ratios, as revealed by the XPS spectra. Here, the molar percentage ratios of  $[\text{Fe}^{2+}]/[\text{Fe}^{3+}]$  and  $[\text{Cr}^{3+}]/[\text{Cr}^{4+}]$  were 18%:82% and 74%:26%, respectively. The  $M_S$  value of the LFCO powders is evaluated based on the following Equations (1-2) and the electronic configurations of  $\text{Fe}^{2+}$  ( $3d^6, t_{2g}^4 e_g^2; \mu_{\text{Fe}^{2+}} = 4.90 \mu_B$ ),  $\text{Fe}^{3+}$  ( $3d^5, t_{2g}^3 e_g^2; \mu_{\text{Fe}^{3+}} = 5.92 \mu_B$ ),  $\text{Cr}^{3+}$  ( $3d^3, t_{2g}^3 e_g^0; \mu_{\text{Cr}^{3+}} = 3.87 \mu_B$ ), and  $\text{Cr}^{4+}$  ions ( $3d^2, t_{2g}^2 e_g^0; \mu_{\text{Cr}^{4+}} = 2.83 \mu_B$ ). In addition, the AFM coupling between the Fe and Cr ions is considered and the molar ratio of Fe:Cr is 1:1 at the B-sites. Thus,

$$\langle m_{\text{Fe}} \rangle = 4.90 \times 18\% + 5.92 \times 82\% = 5.74 \mu_B/\text{f.u.} \quad (1)$$

$$\langle m_{\text{Cr}} \rangle = 3.87 \times 74\% + 2.83 \times 26\% = 3.60 \mu_B/\text{f.u.} \quad (2)$$

$$M_S = \langle m_{\text{Fe}} \rangle - \langle m_{\text{Cr}} \rangle = 2.14 \mu_B/\text{f.u.} \quad (3)$$

In comparison with the above theoretical  $M_S$  ( $= 2.14 \mu_B/\text{f.u.}$ ), the experimental  $M_S = 0.31 \mu_B/\text{f.u.}$  at 5 K, is much smaller due to the existence of large amounts of ASDs in the LFCO powders. The ASD content in the LFCO powders can be assessed by Equation (4)<sup>1</sup>:

$$\text{ASD} = \frac{(1 - \frac{M_S^{\text{exp}}}{M_S^{\text{cal}}})}{2} \quad (4)$$

where  $M_S^{\text{cal}}$  is the theoretical  $M_S$  value, and  $M_S^{\text{exp}}$  the experimental one. The ASD content was calculated to 42.8%, which reflected that the B-site ordering degree ( $\eta$ ) of the LFCO powders was much smaller (14.4%), as described by Equation (5)<sup>2</sup>:

$$\eta = 1 - 2 \times \text{ASD} \quad (5)$$

#### Part B- Effective magnetic moments ( $\mu_{\text{eff}}$ ) and theoretical magnetic moment ( $\mu_{\text{cal}}$ )

By using the CW parameter  $C$  the effective magnetic moments ( $\mu_{\text{eff}}$ ) in the PM phase can be calculated as 6.64  $\mu_B/\text{f.u.}$  (@ 500 Oe) by the following Equation (6)<sup>3</sup>:

$$\mu_{\text{eff}} = \sqrt{\frac{3k_B C}{N_A \mu_B^2}} = 2.828\sqrt{C} \quad (6)$$

As compared with the  $\mu_{\text{eff}}$ , the theoretical magnetic moment,  $\mu_{\text{cal}}$  (per formula unit) of the  $\text{La}_2\text{Fe}_{0.18}^{2+}\text{Fe}_{0.82}^{3+}\text{Cr}_{0.74}^{3+}\text{Cr}_{0.26}^{4+}\text{O}_6$  is determined to be 6.80  $\mu_B/\text{f.u.}$  by using Equation (7)<sup>4</sup>:

$$\mu_{\text{cal}} = \sqrt{0.18 \times \mu_{\text{Fe}^{2+}}^2 + 0.82 \times \mu_{\text{Fe}^{3+}}^2 + 0.74 \times \mu_{\text{Cr}^{3+}}^2 + 0.26 \times \mu_{\text{Cr}^{4+}}^2} \quad (7)$$

where the effective magnetic moments for the  $\text{Fe}^{2+}$  ( $\mu_{\text{Fe}^{2+}} = 4.90 \mu_B$ ),  $\text{Fe}^{3+}$  ( $\mu_{\text{Fe}^{3+}} = 5.92 \mu_B$ ),  $\text{Cr}^{3+}$  ( $\mu_{\text{Cr}^{3+}} = 3.87 \mu_B$ ), and  $\text{Cr}^{4+}$  ( $\mu_{\text{Cr}^{4+}} = 2.83 \mu_B$ ) ions are used<sup>5</sup>.

## References

- [1] Pal S, Govind S, Goyal M, Mukherjee S, Pal B, Saha R, et al. Effect of anti-site disorder on magnetism in  $\text{La}_2\text{NiMnO}_6$ . *Phys Rev B*. 2018;97:165137.
- [2] Moritomo Y, Shimamoto N, Xu S, Machida A, Nishibori E, Takata M, et al. Effects of B-site disorder in  $\text{Sr}_2\text{FeMoO}_6$  with double perovskite structure. *J Appl Phys*. 2001;40:L672-4.
- [3] Rogado NS, Li J, Sleight AW, Subramanian MA. Magnetocapacitance and magnetoresistance near room temperature in a ferromagnetic semiconductor:  $\text{La}_2\text{NiMnO}_6$ . *Adv Mater*. 2005;17:2225-7.
- [4] Taguchi H. Relationship between crystal structure and electrical properties of  $\text{Nd}(\text{Cr}_{1-x}\text{Fe}_x)\text{O}_3$ . *J Solid State Chem*. 1997;131:108-114.
- [5] Buschow KHJ, Boer FR. *Physics of Magnetism and Magnetic Materials*; Springer, 2003.

**TABLE S1** Refined crystal structural parameters (space group, unit cell parameters, average bond lengths and bond angles), structural tolerance factor ( $t$ ), reliability factors, and average crystallite size as well as the magnetic data ( $M_S$ ,  $M_r$ ,  $H_C$ ,  $T_N$ , irreversibility temperature  $T_{irr}$ , Curie-Weiss constant  $C$  and paramagnetic Curie-Weiss temperature  $\theta_p$ , effective paramagnetic moment,  $\mu_{eff}$  calculated from Curie-Weiss constant  $C$ , and theoretically calculated magnetic moment,  $\mu_{cal}$  of the hydrothermal LFCO oxides.

| Materials parameters                              |                                                                                                                                                   | Measured data for the hydrothermal LFCO oxides |                       |                       |                       |                       |                       |                         |                   |                         |                         |  |
|---------------------------------------------------|---------------------------------------------------------------------------------------------------------------------------------------------------|------------------------------------------------|-----------------------|-----------------------|-----------------------|-----------------------|-----------------------|-------------------------|-------------------|-------------------------|-------------------------|--|
| Space group                                       | <i>Pnma</i>                                                                                                                                       |                                                |                       |                       |                       |                       |                       |                         |                   |                         |                         |  |
| Unit cell parameters                              | <i>a</i> = 5.5293(6) Å, <i>b</i> = 7.8192(0) Å, <i>c</i> = 5.5408(9) Å, <i>α</i> = <i>β</i> = <i>γ</i> = 90°, <i>V</i> = 239.56(7) Å <sup>3</sup> |                                                |                       |                       |                       |                       |                       |                         |                   |                         |                         |  |
| Cr-O bond length (Å)                              |                                                                                                                                                   |                                                |                       |                       |                       |                       |                       |                         |                   |                         |                         |  |
| Cr <sub>1</sub> -O <sub>1</sub>                   | 1.9928(2)                                                                                                                                         |                                                |                       |                       |                       |                       |                       |                         |                   |                         |                         |  |
| Cr <sub>1</sub> -O <sub>2</sub>                   | 1.9918(1)                                                                                                                                         |                                                |                       |                       |                       |                       |                       |                         |                   |                         |                         |  |
| Cr <sub>1</sub> -O                                | 1.9923(1)                                                                                                                                         |                                                |                       |                       |                       |                       |                       |                         |                   |                         |                         |  |
| Fe-O bond length (Å)                              |                                                                                                                                                   |                                                |                       |                       |                       |                       |                       |                         |                   |                         |                         |  |
| Fe <sub>1</sub> -O <sub>1</sub>                   | 1.9928(2)                                                                                                                                         |                                                |                       |                       |                       |                       |                       |                         |                   |                         |                         |  |
| Fe <sub>1</sub> -O <sub>2</sub>                   | 1.9918(1)                                                                                                                                         |                                                |                       |                       |                       |                       |                       |                         |                   |                         |                         |  |
| Fe <sub>1</sub> -O                                | 1.9923(1)                                                                                                                                         |                                                |                       |                       |                       |                       |                       |                         |                   |                         |                         |  |
| <∠Fe-O <sub>i</sub> -Cr> bond                     | 158.559(3)                                                                                                                                        |                                                |                       |                       |                       |                       |                       |                         |                   |                         |                         |  |
| angle (°)                                         | 157.529(2)                                                                                                                                        |                                                |                       |                       |                       |                       |                       |                         |                   |                         |                         |  |
| ∠Fe <sub>1</sub> -O <sub>1</sub> -Cr <sub>1</sub> | 158.528(3)                                                                                                                                        |                                                |                       |                       |                       |                       |                       |                         |                   |                         |                         |  |
| ∠Fe <sub>1</sub> -O <sub>2</sub> -Cr <sub>1</sub> |                                                                                                                                                   |                                                |                       |                       |                       |                       |                       |                         |                   |                         |                         |  |
| Structural tolerance factor ( <i>t</i> )          | 0.961 calculated by $t = \frac{\langle r_{La} \rangle + r_{O^{2-}}}{\sqrt{2} \left( \frac{r_{Cr^{3+}} + r_{Fe^{3+}}}{2} + r_{O^{2-}} \right)}$    |                                                |                       |                       |                       |                       |                       |                         |                   |                         |                         |  |
| Reliability factors                               | <i>R</i> <sub>wp</sub> = 6.03%; <i>R</i> <sub>p</sub> = 5.98%; <i>χ</i> <sup>2</sup> = 2.32                                                       |                                                |                       |                       |                       |                       |                       |                         |                   |                         |                         |  |
| Average crystallite size (nm)                     | 41 nm calculated by Scherrer formula (Eq. (1))                                                                                                    |                                                |                       |                       |                       |                       |                       |                         |                   |                         |                         |  |
| Magnetic data                                     | 2 K                                                                                                                                               |                                                |                       | <i>T</i> <sub>N</sub> | <i>T</i> <sub>B</sub> | <i>T</i> <sub>C</sub> | <i>θ</i> <sub>p</sub> | <i>T</i> <sub>irr</sub> | <i>C</i> @ 500 Oe | <i>μ</i> <sub>eff</sub> | <i>μ</i> <sub>cal</sub> |  |
|                                                   | <i>M</i> <sub>S</sub>                                                                                                                             | <i>M</i> <sub>r</sub>                          | <i>H</i> <sub>c</sub> |                       |                       |                       |                       |                         |                   |                         |                         |  |
|                                                   | ( <i>μ</i> <sub>B</sub> /f.u.)                                                                                                                    | ( <i>μ</i> <sub>B</sub> /f.u.)                 | (kOe)                 |                       |                       |                       |                       |                         |                   |                         |                         |  |
|                                                   | 0.31                                                                                                                                              | 0.021                                          | 8.0                   |                       |                       |                       |                       |                         |                   |                         |                         |  |
|                                                   |                                                                                                                                                   |                                                | 10                    | 113                   | 200                   | -441                  | 295                   | 5.51                    | 6.64              | 6.80                    |                         |  |

**TABLE S2** Species, peak positions and relative amount molar ratios obtained from the peak fittings of Fe  $2p_{3/2}$ , Cr  $2p_{3/2}$  and O  $1s$  XPS spectra of the hydrothermal LFCO powders and the effective oxidation states of the Fe and Cr elements.

| XPS results |                                              | Hydrothermal LFCO powders |               |                                                   |
|-------------|----------------------------------------------|---------------------------|---------------|---------------------------------------------------|
| XPS spectra | Fe 2p <sub>3/2</sub>                         | Species                   | Position (eV) | Relative amount ratio                             |
|             |                                              | Fe <sup>2+</sup>          | 710.15        | [Fe <sup>2+</sup> ]/[Fe <sup>3+</sup> ] = 18%:82% |
|             |                                              | Fe <sup>3+</sup>          | 711.41        |                                                   |
|             | Cr 2p <sub>3/2</sub>                         | Species                   | Position      | Relative amount ratio                             |
|             |                                              | Cr <sup>3+</sup>          | 576.25        | [Cr <sup>3+</sup> ]:[Cr <sup>4+</sup> ] = 74%:26% |
|             |                                              | Cr <sup>4+</sup>          | 578.90        |                                                   |
|             | O 1s                                         | Species                   | Position      | Content ratio                                     |
|             |                                              | O <sub>α</sub>            | 529.42        | [O <sub>α</sub> ]:[O <sub>β</sub> ] = 46%: 54%    |
|             |                                              | O <sub>β</sub>            | 531.70        |                                                   |
|             | Effective oxide states of Fe and Cr elements |                           |               |                                                   |
|             |                                              |                           |               | Cr element: + 3.26                                |
